# Supplementary material
Source: PubMed Central journal article supplement (PMC2797178)
Supplement: supp_M109.070235_jbc.M109.070235-1.pdf [file supp_M109.070235_jbc.M109.070235-1.pdf]

## FUNCTIONAL STUDIES OF SPLIT ARABIDOPSIS $\text{Ca}^{2+}/\text{H}^{+}$

### Supplemental Figure S1. Topology and Design of CAX half proteins.

(A and B) Schematic representation of the procedure for making split half proteins. Topology was predicted using transmembrane domain hidden Markov model (TMHMM version 2.0). Rectangles represent the vacuolar membrane. In, cytosol side; Out, vacuolar lumen side. N-terminal truncated versions of CAX1 (sCAX1) (A) and CAX3 (sCAX3) (B) were cut into N-terminal and C-terminal halves by using a PCR cloning strategy and dividing the proteins at the acidic motif (as shown by arrow, see Supplemental Table S2). A stop codon was added to the N-terminal ORF and a start codon added to the C-terminal ORF. The ORF halves of sCAX1 and sCAX3 were subcloned into yeast expression vectors, by adding a stop codon and start codon to the end of N-terminal half and the start of the C terminus half.

(C-F) Schematic representation of the topology of full-length CAX1 and CAX3, and CAX1 and CAX3 N- and C-terminal half proteins with or without an N-terminal ubiquitin (Nub) or C-terminal ubiquitin (Cub) fusion. Topology was predicted using transmembrane domain hidden Markov model (TMHMM version 2.0). Rectangles represent the vacuolar membrane. In, cytosol side; Out, vacuolar lumen side. (C) CAX1 full-length protein (CAX1) without or with Nub and Cub fusions at the N terminus (Nub-CAX1 or Cub-CAX1) or at the C terminus (CAX1-Nub or CAX1-Cub). (D) CAX3 full-length protein (CAX3) without or with Nub fusions at the N terminus (Nub-CAX3). (E) CAX1 N-terminal half protein (N-CAX1; amino acids 1 to 272) without or with Nub or Cub fusions at the N terminus (Nub-N-CAX1) or at the C terminus (N-CAX1-Nub or N-CAX1-Cub). (F) CAX3 C-terminal half protein (amino acids 275-459) without or with Nub fusion at the N-terminus (Nub-C-CAX3).

### Supplemental Figure S2. Functionality of epitope tagged CAX1 and CAX3 N-terminal and C-terminal half protein complexes.

Suppression of  $\text{Ca}^{2+}$  sensitivity of K667 yeast co-expressing: sCAX1 N-terminal half protein (N-sCAX1)+c-Myc-tagged CAX1 C-terminal half protein (C-CAX1-Myc), N-sCAX1+GFP-tagged CAX3 C-terminal half protein (C-CAX3-GFP), GFP-tagged N-sCAX1 (N-sCAX1-GFP)+C-CAX1, or N-sCAX1+RFP-tagged C-CAX3 (C-CAX3-RFP). sCAX1 and empty vectors were used as controls. Yeast growth was performed as described in Fig. 1.

### Supplementary Table S1. PCR primers used in this study

| Primer name  | Primer sequence with introduced restriction enzyme site (underlined) | Enzyme site |
|--------------|----------------------------------------------------------------------|-------------|
| N-sCAX1F     | 5' - <u>GGCCAAATCGGCCATGTCTTCTTCTTTGAGG</u> -3'                      | SfiI        |
| N-sCAX1R     | 5' - <u>GGCCCTTATGGCCTTACTCATCTTCTTGTG</u> -3'                       | SfiI        |
| C-CAX1F      | 5' - <u>GGCCAAATCGGCCATGTATGATGACGATGTGGAGCAAG</u> -3'               | SfiI        |
| C-CAX1R      | 5' - <u>CGGCCCTTATGGCCTTAAGATGAGAAAACCTCCTCC</u> -3'                 | SfiI        |
| N-sCAX3F     | 5' - <u>GGCCAAATCGGCCATGTCTTCATCGTCGCTAAG</u> -3'                    | SfiI        |
| N-sCAX3R     | 5' - <u>GGCCCTTATGGCCTTATGCATCATCATCCTG</u> -3'                      | SfiI        |
| C-CAX3F      | 5' - <u>GGCCAAATCGGCCATGTATGATGATGAGGTTAG</u> -3'                    | SfiI        |
| C-CAX3R      | 5' - <u>CGGCCCTTATGGCCTTAAGCTGAGAAAACCTTCTC</u> -3'                  | SfiI        |
| N-sCAX1HAF   | 5' - <u>GAGCGGCCGCATGTCTTCTTCTTTGAGG</u> -3'                         | NotI        |
| N-sCAX1HAR   | 5' - <u>GGGATCCTTACTCATCTTCTTCTTCTTG</u> -3'                         | BamHI       |
| C-CAX3GFPP   | 5' - <u>GGTACCACTAGTATGTATGATGATGAGGTTAG</u> -3'                     | SpeI        |
| C-CAX3GFPR   | 5' - <u>CGAATTCGCGGCCGCGGAGCTGAGAAAACCTTCTC</u> -3'                  | NotI        |
| C-CAX3RFPF   | 5' - <u>GGTACCACTAGTATGTATGATGATGAGGTTAG</u> -3'                     | SpeI        |
| C-CAX3RFPR   | 5' - <u>CGAATTCGCGGCCGCTAAGCTGAGAAAACCTTCTC</u> -3'                  | NotI        |
| N-sCAX1BiFCF | 5' - <u>AAAGAGCTCATGTCTTCTTCTTTGAGG</u> -3'                          | SacI        |

|                         |                                                         |       |
|-------------------------|---------------------------------------------------------|-------|
| N-sCAX1BiFCR            | 5' -AAAGGATCCTTACTCATCTTCCTGTTCTTGTG-3'                 | BamHI |
| C-CAX1BiFCF             | 5' -AAAGAGCTCATGTATGATGACGATTGTGAGCAAG-3'               | SacI  |
| C-CAX1BiFCR             | 5' -AAAGGATCCTTAAGATGAGAAAACCTCCTCC-3'                  | BamHI |
| C-CAX3BiFCF             | 5' -AAAGAGCTCATGTATGATGATGAGGTTAG-3'                    | SacI  |
| C-CAX3BiFCR             | 5' -AAAGGATCCTTAAGCTGAGAAAACCTTCTC-3'                   | BamHI |
| CAX1BiFCF               | 5' -AAAGAGCTCATGGCGGGAATCGTGACAGAG-3'                   | SacI  |
| CAX1BiFCR               | 5' -AAAGGATCCTTAAGATGAGAAAACCTCCTCC-3'                  | BamHI |
| CAX3BiFCF               | 5' -AAAGAGCTCATGGGAAGTATCGTGGAGCCATG-3'                 | SacI  |
| CAX3BiFCR               | 5' -AAAGGATCCTTAAGCTGAGAAAACCTTCTC-3'                   | BamHI |
| CAX2BiFCF               | 5' -AAAGAGCTCATGAGTTGTTGTAAAG-3'                        | SacI  |
| CAX2BiFCR               | 5' -AAAGGATCCTTATATACCATCTTGG-3'                        | BamHI |
| ACT8BiFCF               | 5' -AAATCTAGAATGGCCGATGCTGATGACATTC-3'                  | XbaI  |
| ACT8BiFCR               | 5' -AAAGGTACCGAAGCATTTTCTGTGGACAATG-3'                  | KpnI  |
| CAX3BamHIF <sup>a</sup> | 5' -GAATTCCGTCTCGTTGCGTGGAT <b>A</b> CTGGGAATAAAAATG-3' | BsmBI |
| CAX3BamHIR              | 5' -GAATTCCGTCTCCGCAACGATAACACTCAATGGGACCAC-3'          | BsmBI |

<sup>a</sup>The mutation site to abolish the BamHI restriction site is indicated in bold on the CAX3BamHIF primer.

**Supplemental Table S2.** Yeast plasmid constructs used in this study

| Constructs                      | Vector, Promoter, and replication origin | selection marker | References                                               |
|---------------------------------|------------------------------------------|------------------|----------------------------------------------------------|
| CAX1, aa1 -aa 463               | pHGpd, GPD, CEN                          | His              | Shigaki <i>et al</i> , 2001                              |
| CAX1, aa1 -aa 463               | pUGpd, GPD, CEN                          | Ura              | Shigaki <i>et al</i> , 2001                              |
| CAX3, aa1 -aa 459               | pHGpd, GPD, CEN                          | His              | Shigaki <i>et al</i> , 2001                              |
| CAX3, aa1 -aa 459               | pUGpd, GPD, CEN                          | Ura              | Shigaki <i>et al</i> 2001                                |
| sCAX1, aa 37- aa 463            | pUGpd, GPD, CEN                          | Ura              | Shigaki <i>et al</i> , 2001                              |
| sCAX1, aa 37- aa 463            | pHGpd, GPD, CEN                          | His              | Shigaki <i>et al</i> , 2001                              |
| sCAX1H338N, aa 37-aa 463, H338N | pHGpd, GPD, CEN                          | His              | Shigaki <i>et al</i> , 2005                              |
| sCAX3, aa 37- aa 459            | pUGpd, GPD, CEN                          | Ura              | Shigaki <i>et al</i> , 2001                              |
| sCAX3, aa 37- aa 459            | pHGpd, GPD, CEN                          | His              | Shigaki <i>et al</i> , 2001                              |
| N-sCAX1, aa37-aa 236            | pUGpd, GPD, CEN                          | Ura              | This study                                               |
| N-sCAX1, aa37-aa 236            | pHGpd, GPD, CEN                          | His              | This study                                               |
| HA-N-sCAX1, aa37-aa 236         | pHGpd, GPD, CEN                          | His              | This study                                               |
| HA-N-sCAX1, aa37-aa 236         | pUGpd, GPD, CEN                          | Ura              | This study                                               |
| N-sCAX1-GFP, aa37-aa 236        | pHGpd, GPD, CEN                          | His              | This study                                               |
| C-CAX1, aa 237-aa 463           | pUGpd, GPD, CEN                          | Ura              | This study                                               |
| C-CAX1, aa 237-aa 463           | pHGpd, GPD, CEN                          | His              | This study                                               |
| C-CAX1-c-Myc, aa 237-aa 463     | pHGpd, GPD, CEN                          | His              | This study                                               |
| C-CAX1H338N, aa237-aa463, H338N | pUGpd, GPD, CEN                          | Ura              | This study                                               |
| N-sCAX3, aa 37-aa 238           | pUGpd, GPD, CEN                          | Ura              | This study                                               |
| N-sCAX3, aa 37-aa 238           | pHGpd, GPD, CEN                          | His              | This study                                               |
| C-CAX3, aa 239- aa 459          | pUGpd, GPD, CEN                          | Ura              | This study                                               |
| C-CAX3, aa 239- aa 459          | pHGpd, GPD, CEN                          | His              | This study                                               |
| C-CAX3-GFP, aa 239- aa 459      | pHGpd, GPD, CEN                          | His              | This study                                               |
| C-CAX3-RFP, aa 239- aa 459      | pUGpd, GPD, CEN                          | Ura              | This study                                               |
| <b>Split Ubiquitin Assay</b>    |                                          |                  |                                                          |
| CAX1-Cub, aa1 -aa 463           | pMetYCgate, Met25, CEN/ARS               | Leu              | This study                                               |
| Nub-CAX1, aa1 -aa 463           | pNXgate 33, ADH, CEN                     | Trp              | This study                                               |
| Nub-CAX3, aa1-aa 459            | pNXgate 33, ADH, CEN                     | Trp              | This study                                               |
| N-CAX1-Cub, aa1-aa 237          | pMetYCgate, Met25, CEN/ARS               | Leu              | This study                                               |
| Nub-N-CAX1, aa1-aa 237          | pNXgate 33, ADH, CEN                     | Trp              | This study                                               |
| Nub-C-CAX1, aa 237- aa 459      | pNXgate 33, ADH, CEN                     | Trp              | This study                                               |
| KAT1-Cub                        | pMetYCgate, Met25, CEN/ARS               | Leu              | Obrdlik <i>et al</i> , 2004; Ludewig <i>et al</i> , 2003 |
| Nub-KAT1                        | pNXgate 33, ADH, CEN                     | Trp              | Obrdlik <i>et al</i> , 2004; Ludewig <i>et al</i> , 2003 |
| NubWTgate                       | pNXgate 33, ADH, CEN                     | Trp              | Obrdlik <i>et al</i> , 2004; Ludewig <i>et al</i> , 2003 |

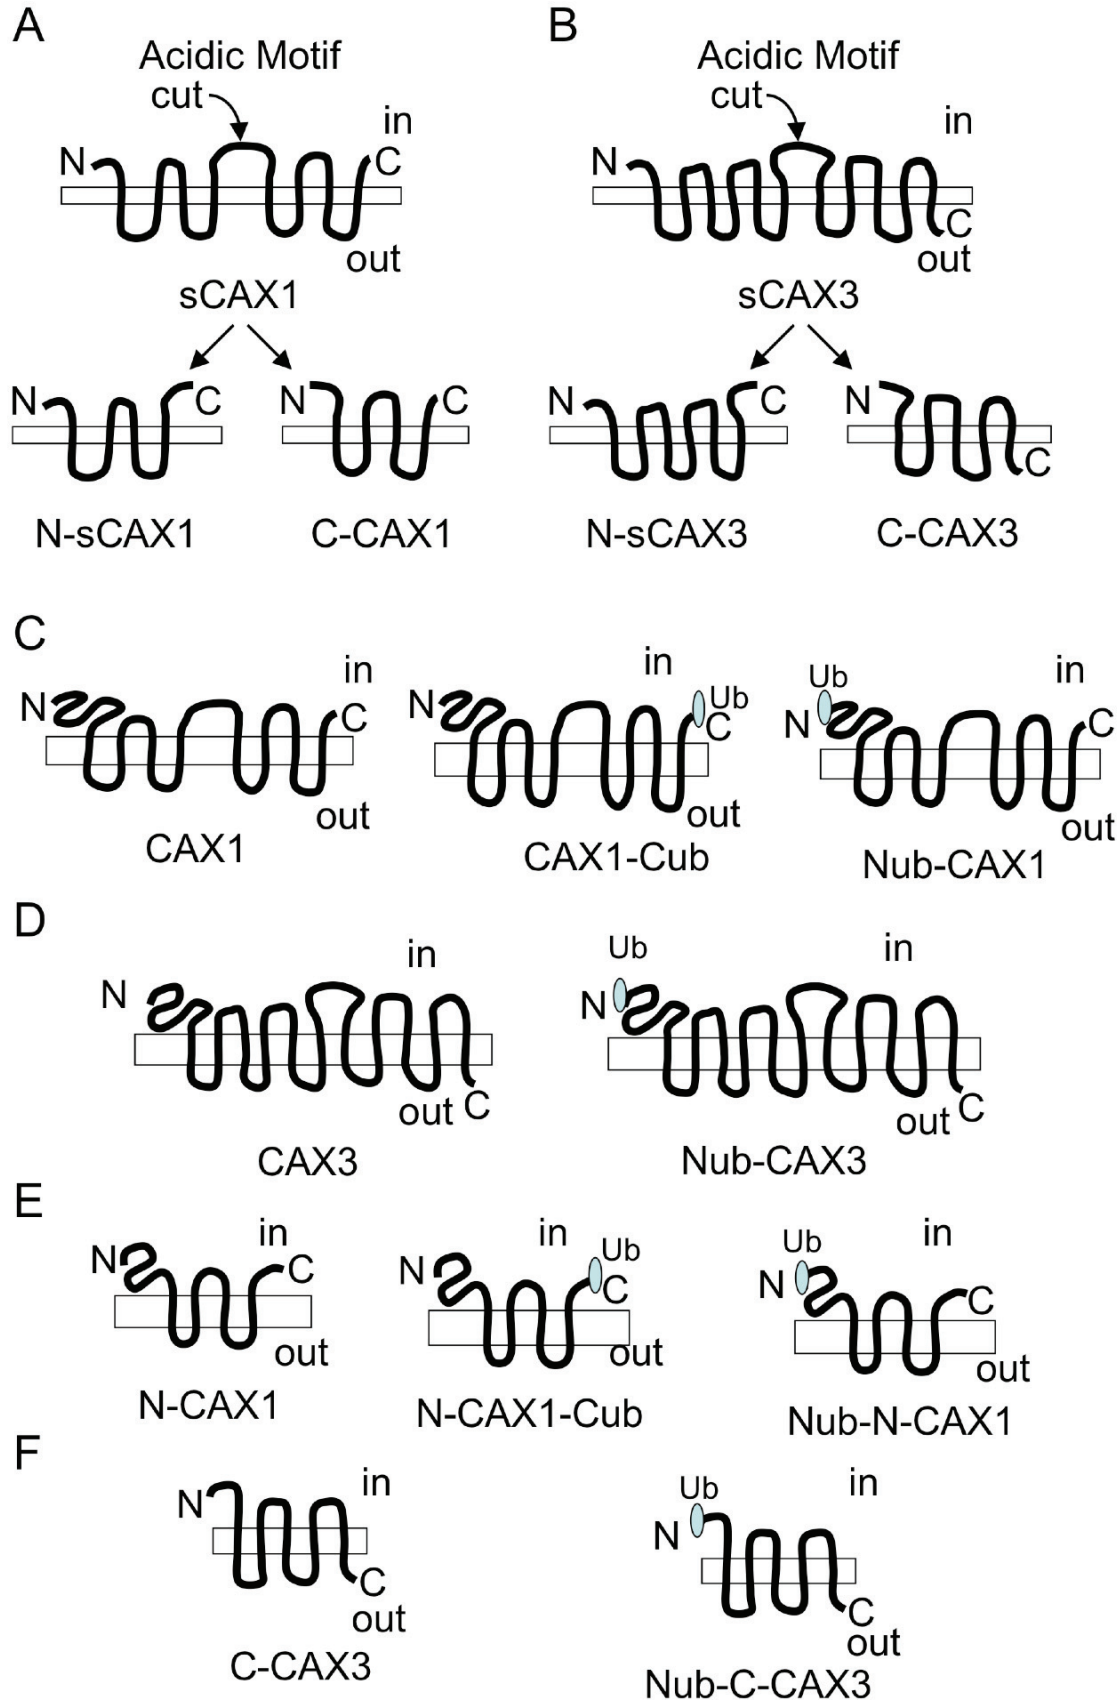

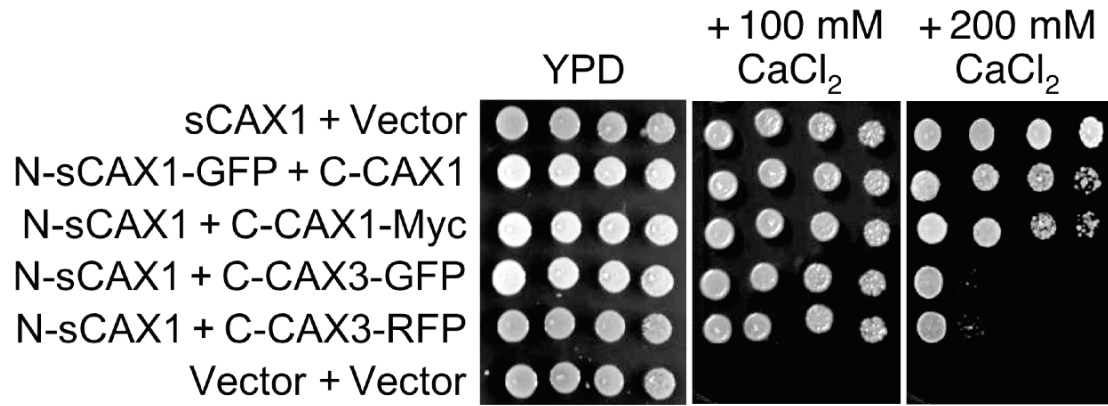

S2
